# Supplementary material
Source: PubMed Central journal article supplement (PMC1635462)
Supplement: rspb20063619s04.pdf [file rspb20063619s04.pdf]

Electronic supplementary material

Major lipids (mean  $\pm$  SEM of % TIC) found in femoral secretions of male Iberian rock lizards, *Lacerta monticola*, before and after twenty five days of being supplemented regularly with distilled water (C-males) or vitamin D<sub>3</sub> (S-males)

| Compound                            | Before         |                | After          |                |
|-------------------------------------|----------------|----------------|----------------|----------------|
|                                     | C-males        | S-males        | C-males        | S-males        |
| Dodecanoic acid                     | 1.2 $\pm$ 0.1  | 1.0 $\pm$ 0.1  | 1.8 $\pm$ 0.2  | 2.4 $\pm$ 0.2  |
| Hexadecanoic acid                   | 4.3 $\pm$ 0.6  | 4.2 $\pm$ 0.6  | 2.4 $\pm$ 0.3  | 2.6 $\pm$ 0.4  |
| Hexadecenoic acid                   | 0.2 $\pm$ 0.1  | 0.2 $\pm$ 0.1  | 0.1 $\pm$ 0.1  | 0.2 $\pm$ 0.1  |
| Octadecanoic acid                   | 1.1 $\pm$ 0.1  | 1.0 $\pm$ 0.2  | 0.8 $\pm$ 0.1  | 1.2 $\pm$ 0.2  |
| Octadecenoic acid                   | 2.1 $\pm$ 0.3  | 2.1 $\pm$ 0.4  | 0.9 $\pm$ 0.1  | 1.1 $\pm$ 0.2  |
| Octadecadienoic acid                | 0.3 $\pm$ 0.1  | 0.3 $\pm$ 0.1  | 0.1 $\pm$ 0.1  | 0.3 $\pm$ 0.1  |
| Eicosanoic acid                     | 0.2 $\pm$ 0.1  | 0.2 $\pm$ 0.1  | 0.4 $\pm$ 0.1  | 0.2 $\pm$ 0.1  |
| Cholesterol                         | 74.5 $\pm$ 2.3 | 75.6 $\pm$ 2.1 | 76.4 $\pm$ 1.1 | 73.8 $\pm$ 1.5 |
| Cholesta-5,7-dien-3-ol              | 0.4 $\pm$ 0.1  | 0.3 $\pm$ 0.1  | 0.3 $\pm$ 0.1  | 0.5 $\pm$ 0.1  |
| Ergosterol                          | 0.8 $\pm$ 0.1  | 1.0 $\pm$ 0.2  | 0.6 $\pm$ 0.1  | 1.0 $\pm$ 0.1  |
| Stigmata-5,24-dien-3-ol             | 0.6 $\pm$ 0.1  | 0.9 $\pm$ 0.2  | 0.5 $\pm$ 0.1  | 0.9 $\pm$ 0.1  |
| Campesterol                         | 6.8 $\pm$ 0.9  | 6.5 $\pm$ 0.4  | 8.1 $\pm$ 0.5  | 8.2 $\pm$ 0.6  |
| Ergosta-5.8-dien-3-ol               | 2.2 $\pm$ 0.5  | 1.9 $\pm$ 0.4  | 1.2 $\pm$ 0.1  | 1.0 $\pm$ 0.1  |
| Lanost-8-en-3-ol                    | 0.6 $\pm$ 0.1  | 0.4 $\pm$ 0.1  | 0.5 $\pm$ 0.1  | 0.4 $\pm$ 0.1  |
| Sitosterol                          | 1.6 $\pm$ 0.3  | 1.5 $\pm$ 0.2  | 2.8 $\pm$ 0.3  | 3.1 $\pm$ 0.3  |
| 4.4-Dimethyl-cholesta-5.7-dien-3-ol | 2.8 $\pm$ 0.5  | 2.7 $\pm$ 0.6  | 1.9 $\pm$ 0.2  | 2.0 $\pm$ 0.3  |
